# Supplementary material for: Salmon Gravlax Biopreservation With Lactic Acid Bacteria: A Polyphasic Approach to Assessing the Impact on Organoleptic Properties, Microbial Ecosystem and Volatilome Composition
Source: Front Microbiol. 2020 Jan 21;10:3103. doi: 10.3389/fmicb.2019.03103 (PMC6986196; doi:10.3389/fmicb.2019.03103)
Supplement: Supplementary file 2 [file Data_Sheet_2.xlsx]

## Sheet: Differential abundance analysis
Supplementary data 2 for : Salmon gravlax biopreservation with lactic acid bacteria: A polyphasic approach to assessing the impact on organoleptic properties, microbial ecosystem and volatilome composition (Wiernasz et al.)
Pairwise differential abundance analysis against control for each sampling times (p value > 0.01) - OTUs were filtred on abundance (> 0.05%)
C. maltaromaticum SF1944 versus Control							V. fluvialis CD264 versus Control
baseMean	Log2fc	pvalue	padj	OTUs			baseMean	Log2fc	pvalue	padj	OTUs
T0							T0
18598.6	9.26515	1.27236e-77	3.1809e-76	Carnobacterium			342.67	2.46458	0.000176739	0.00220924	Vibrio
Day 7							8617.55	11.57	1.34703e-36	3.36758e-35	Vagococcus
20.5125	-3.99707	0.00194268	0.00971342	Psychrobacter			Day 7
58.6731	6.61762	6.92085e-10	8.65106e-09	Leuconostoc			14.8378	4.10968	2.82743e-08	3.53429e-07	Leuconostoc
18.159	6.59421	1.12066e-06	9.33887e-06	Vagococcus			4745.54	14.1244	7.85749e-40	1.96437e-38	Vagococcus
35899.9	8.03283	2.0874e-17	5.21849e-16	Carnobacterium			Day 14
53.5945	-6.94278	1.20477e-05	7.52978e-05	Brochothrix			55.3207	8.0202	6.91472e-10	8.29767e-09	Leuconostoc
Day 14							2654.33	10.0343	2.91243e-39	6.98983e-38	Vagococcus
4695.48	-2.51775	1.8547e-05	0.000222563	Lactococcus			Day 21
44275.5	5.19967	6.52299e-27	1.56552e-25	Carnobacterium			600.851	7.39163	9.07956e-58	2.26989e-56	Vagococcus
Day 21
1334.78	-7.08164	3.5004e-07	3.85044e-06	Lactobacillus
12505	5.2246	9.08314e-17	1.99829e-15	Carnobacterium
L. piscium EU2229 versus Control							C. inhibens MIP2551 versus Control
baseMean	Log2fc	pvalue	padj	OTUs			baseMean	Log2fc	pvalue	padj	OTUs
at T0							T0
9964.24	9.68648	7.18186e-57	1.79547e-55	Lactococcus			14980.9	9.05218	4.24068e-74	1.06017e-72	Carnobacterium
37.197	7.13597	8.00912e-09	1.00114e-07	Lactococcus 2			Day 7
Day 7							164.009	3.16716	0.00156526	0.00782629	Shewanella
71.183	-3.71591	0.000439784	0.00274865	Pseudomonas			304.216	3.08251	0.00154812	0.00782629	Morganella
29360.7	9.42596	2.06655e-27	5.16638e-26	Lactococcus			267.32	4.71923	2.04374e-05	0.000255468	Lactococcus 2
34.0156	5.91375	1.82185e-08	2.27732e-07	Leuconostoc			311.984	7.78218	1.08332e-07	2.70831e-06	Leuconostoc
6.70651	5.29538	0.000113496	0.000945803	Vagococcus			7153.91	3.92069	4.21878e-05	0.000351565	Carnobacterium
Day 14							Day 14
53001.1	3.59009	0.000422627	0.00528283	Lactococcus			881.086	11.9194	2.02065e-24	5.05162e-23	Leuconostoc
55.7183	8.64686	1.3443e-09	3.36074e-08	Leuconostoc			Day 21
Day 21							11168.2	-1.64824	8.53775e-05	0.000981841	Photobacterium
34092.5	3.65707	5.98724e-18	1.49681e-16	Lactococcus			1826.04	6.83682	1.48143e-14	3.4073e-13	Leuconostoc
205.984	-1.91122	0.000446002	0.00371669	Lactococcus 2
362.25	-2.09101	6.41675e-06	8.02094e-05	Carnobacterium
L. gelidum EU2249 versus Control							A. viridans SF1044 vs Control à J0
baseMean	Log2fc	pvalue	padj	OTUs			baseMean	Log2fc	pvalue	padj	OTUs
at T0							T0
2152.63	7.00824	5.48699e-32	1.37175e-30	Leuconostoc			21821.2	2.56987	0.000970445	0.00790315	Photobacterium
Day 7							566.712	-4.32784	0.0012645	0.00790315	Duganella
25527.5	15.7784	1.44339e-71	3.60847e-70	Leuconostoc			29.0329	-5.37749	7.37485e-05	0.000921856	Lactococcus
6.77541	5.53433	3.24369e-05	0.000270308	Vagococcus			18701.3	10.625	6.81661e-108	1.70415e-106	Aerococcus
41.6051	-7.55254	2.43688e-07	3.0461e-06	Brochothrix			Day 7
Day 14							2438.49	8.15544	1.27686e-41	3.19215e-40	Aerococcus
9733.28	-0.987417	0.000133089	0.000554536	Serratia/Yersinia			Day 14
12.4108	2.61383	0.00236894	0.00740294	Psychrobacter			24.2026	7.40388	2.95229e-08	3.69036e-07	Leuconostoc
12.2782	2.36163	0.000623391	0.0022264	Corynebacterium			851.925	11.8566	3.54242e-23	8.85605e-22	Aerococcus
4915.05	-4.94434	1.11513e-20	1.39392e-19	Lactococcus			Day 21
432.92	-7.60133	1.02205e-15	6.38778e-15	Lactococcus 2			No statistical differences
33468	17.5632	1.18206e-63	2.95516e-62	Leuconostoc
1510.03	-4.31404	3.80836e-16	3.17363e-15	Carnobacterium
55.3334	-3.83104	9.95086e-06	4.97543e-05	Brochothrix
Day 21
19162.4	1.12296	0.00317945	0.00847852	Photobacterium
3.94225	5.72797	0.000777067	0.00266423	Duganella
10.3945	4.66628	6.67029e-05	0.000266812	Corynebacterium
2994.11	-5.6145	3.11069e-46	3.73283e-45	Lactococcus
188.994	-8.18125	3.74027e-18	2.99221e-17	Lactococcus 2
18726.8	10.721	2.6009e-170	6.24216e-169	Leuconostoc
1334.4	-7.2647	5.05247e-05	0.000242519	Lactobacillus
384.323	-3.16084	6.05287e-14	3.63172e-13	Carnobacterium
14.7902	-3.10053	0.00094342	0.00283026	Brochothrix
